# Supplementary material for: An Entropy-based gene selection method for cancer classification using microarray data
Source: Springer Nature journal article supplement (doi:10.1186/1471-2105-6-76), 2005-03-24
Supplement: 12859_2004_401_MOESM1_ESM.pdf [file 12859_2004_401_MOESM1_ESM.pdf]

## Selected Genes for All Datasets

March 22, 2005

Table 1: Selected Genes Comparison for SRBCT Data Set

| Image ID | Gene                                                                                         | Rank in [2] |
|----------|----------------------------------------------------------------------------------------------|-------------|
| 296448   | insulin-like growth factor 2 somatomedin A)                                                  | 1           |
| 207274   | Human DNA for insulin-like growth factor II (IGF-2); exon 7 and additional ORF               | 2           |
| 841641   | cyclin D1 (PRAD1: parathyroid adenomatosis 1)                                                | 3           |
| 365826   | growth arrest-specific 1                                                                     | 4           |
| 770394   | Fc fragment of IgG, receptor, transporter, alpha                                             | 6           |
| 244618   | ESTs                                                                                         | 7           |
| 43733    | glycogenin 2                                                                                 | 9           |
| 295985   | ESTs                                                                                         | 10          |
| 629896   | microtubule-associated protein 1B                                                            | 11          |
| 866702   | protein tyrosine phosphatase, non-receptor type 13 (APO-1/CD95 (Fas)-associated phosphatase) | 15          |
| 377461   | caveolin 1, caveolae protein, 22kD                                                           | 18          |
| 52076    | olfactomedinrelated ER localized protein                                                     | 19          |
| 308163   | ESTs                                                                                         | 21          |
| 812105   | transmembrane protein                                                                        | 22          |
| 183337   | major histocompatibility complex, class II, DM alpha                                         | 23          |
| 298062   | troponin T2, cardiac                                                                         | 25          |
| 204545   | ESTs                                                                                         | 28          |
| 383188   | recoverin                                                                                    | 29          |
| 289645   | amyloid beta (A4) precursor-like protein 1                                                   | 32          |
| 324494   | heat shock 27kD protein 2                                                                    | 33          |
| 1473131  | transducin-like enhancer of split 2, homolog of Drosophila E(sp1)                            | 35          |
| 878280   | collapsin response mediator protein 1                                                        | 38          |
| 609663   | protein kinase, cAMP-dependent, regulatory, type II, beta                                    | 41          |
| 461425   | MYL4                                                                                         | 42          |
| 1469292  | pim-2 oncogene                                                                               | 43          |
| 1409509  | troponin T1, skeletal, slow                                                                  | 48          |
| 788107   | amphiphysin-like                                                                             | 49          |
| 308231   | Homo sapiens incomplete cDNA for a mutated allele of a myosin class I, myh-1c                | 53          |
| 21652    | catenin (cadherin-associated protein), alpha 1 (102kD)                                       | 55          |
| 241412   | E74-like factor 1 (ets domain transcription factor)                                          | 58          |

Continued on next page

Table 1 – continued from previous page

| Image ID | Gene                                                                                     | Rank in [2] |
|----------|------------------------------------------------------------------------------------------|-------------|
| 814260   | follicular lymphoma variant translocation 1                                              | 60          |
| 859359   | quinone oxidoreductase homolog                                                           | 61          |
| 80338    | selenium binding protein 1                                                               | 63          |
| 784224   | fibroblast growth factor receptor 4                                                      | 68          |
| 1435862  | antigen identified by monoclonal antibodies 12E7, F21 and O13                            | 73          |
| 377048   | Homo sapiens incomplete cDNA for a mutated allele of a myosin class I, myh-1c            | 74          |
| 784257   | kinesin family member 3C                                                                 | 76          |
| 42558    | glycine amidinotransferase (L-arginine:glycine amidinotransferase)                       | 77          |
| 814526   | ESTs                                                                                     | 78          |
| 395708   | DPYSL4                                                                                   | 80          |
| 796258   | sarcoglycan, alpha (50kD dystrophin-associated glycoprotein)                             | 89          |
| 624360   | proteasome (prosome, macropain) subunit, beta type, 8 (large multifunctional protease 7) | -           |
| 767495   | GLI-Kruppel family member GLI3 (Greig cephalopolysyndactyly syndrome)                    | -           |
| 796475   | ESTs, Moderately similar to skeletal muscle LIM-protein FHL3 [H.sapiens]                 | -           |
| 491565   | Cbp/p300-interacting transactivator, with Glu/Asp-rich carboxy-terminal domain, 2        | -           |
| 530185   | CD83 antigen (activated B lymphocytes, immunoglobulin superfamily)                       | -           |
| 143306   | lymphocyte-specific protein 1                                                            | -           |
| 745019   | EH domain containing 1                                                                   | -           |
| 769716   | neurofibromin 2 (bilateral acoustic neuroma)                                             | -           |
| 782193   | thioredoxin                                                                              | -           |
| 236282   | Wiskott-Aldrich syndrome (eczema-thrombocytopenia)                                       | -           |
| 810057   | cold shock domain protein A                                                              | -           |
| 586854   | ESTs                                                                                     | -           |
| 898219   | mesoderm specific transcript (mouse) homolog                                             | -           |
| 740604   | interferon stimulated gene (20kD)                                                        | -           |
| 212640   | Rho GTPase activating protein 4                                                          | -           |
| 293500   | ESTs                                                                                     | -           |
| 1471841  | ATPase, Na <sup>+</sup> /K <sup>+</sup> transporting, alpha 1 polypeptide                | -           |

Note: - means not being selected in the list

Table 2: Selected Genes Comparison For Breast Cancer Data Set

| Accession NO | Gene                              | Rank in [3] |
|--------------|-----------------------------------|-------------|
| X52003       | H.sapiens pS2 protein gene        | 1           |
| X03635       | Human mRNA for oestrogen receptor | 2           |

Continued on next page

Table 2 – continued from previous page

| Accession NO  | Gene                                                                                                                         | Rank in [3] |
|---------------|------------------------------------------------------------------------------------------------------------------------------|-------------|
| M29874        | Human cytochrome P450-IIB (hIIB1) mRNA                                                                                       | 3           |
| L08044        | Human intestinal trefoil factor mRNA                                                                                         | 4           |
| U79293        | Human clone 23948 mRNA sequence                                                                                              | 6           |
| J03778        | Human microtubule-associated protein tau mRNA                                                                                | 7           |
| X58072        | Human hGATA3 mRNA for trans-acting T-cell specific transcription factor                                                      | 9           |
| X17059        | Human NAT1 gene for arylamine N-acetyltransferase                                                                            | 12          |
| U39840        | Human hepatocyte nuclear factor-3 alpha (HNF-3 alpha) mRNA                                                                   | 16          |
| X87212        | H.sapiens mRNA for cathepsin C                                                                                               | 19          |
| U41060        | Human breast cancer, estrogen regulated LIV-1 protein (LIV-1) mRNA                                                           | 25          |
| D38437        | Human DNA mismatch repair mRNA                                                                                               | 27          |
| M24485        | Homo sapiens (clone pHGST-pi) glutathione S-transferase pi (GSTP1) gene                                                      | 31          |
| U05340        | Human p53CDC mRNA                                                                                                            | 41          |
| X83425        | H.sapiens LU gene for Lutheran blood group glycoprotein                                                                      | 45          |
| X81420        | H.sapiens mRNA for hHKb1 protein                                                                                             | -           |
| L76191        | Homo sapiens interleukin-1 receptor-associated kinase (IRAK) mRNA                                                            | -           |
| HG1496-HT1496 | Adrenal-Specific Protein Pg2                                                                                                 | -           |
| X16662        | Human mRNA for vascular anticoagulant-beta (VAC-beta)                                                                        | -           |
| U42408        | Human ladinin (LAD) mRNA                                                                                                     | -           |
| M73547        | Human polyposis locus (DP1 gene) mRNA                                                                                        | -           |
| X83618        | H.sapiens mRNA for 3-hydroxy-3-methylglutaryl coenzyme A synthase                                                            | -           |
| Z00010        | H.sapiens germ line pseudogene for immunoglobulin kappa light chain leader peptide and variable region (subgroup V kappa I). | -           |
| D50495        | Human mRNA for transcription elongation factor S-II, hS-II-T1                                                                | -           |
| X96484        | H.sapiens mRNA for DGCR6 protein                                                                                             | -           |
| J03827        | Y box binding protein-1 (YB-1) mRNA                                                                                          | -           |
| X52947        | Human mRNA for cardiac gap junction protein                                                                                  | -           |
| HG2702-HT2798 | Serine/Threonine Kinase                                                                                                      | -           |
| X56807        | Human DSC2 mRNA for desmocollins type 2a and 2b                                                                              | -           |
| HG880-HT880   | Mucin 6, Gastric                                                                                                             | -           |
| L17131        | Human high mobility group protein (HMG-I(Y)) gene exons 1-8                                                                  | -           |

Note: - means not being selected in the list

Table 3: Selected Genes Comparison For Colon Cancer Data Set

| Accession NO | Gene              | Weight in [1] |
|--------------|-------------------|---------------|
| M63391       | Human desmin gene | 0.5182        |

Continued on next page

Table 3 – continued from previous page

| Accession NO | Gene                                                              | Weight in [1] |
|--------------|-------------------------------------------------------------------|---------------|
| M76378       | Human cysteine-rich protein (CRP) gene                            | 0.4880        |
| R46753       | CYCLIN-DEPENDENT KINASE INHIBITOR 1 (Homo sapiens)                | 0.4450        |
| J02854       | MYOSIN REGULATORY LIGHT CHAIN 2, SMOOTH MUSCLE ISOFORM (HUMAN)    | 0.2912        |
| M22382       | MITOCHONDRIAL MATRIX PROTEIN P1 PRECURSOR (HUMAN)                 | 0.1850        |
| Z50753       | H.sapiens mRNA for GCAP-II/uroguanylin precursor                  | 0.1147        |
| X63629       | H.sapiens mRNA for p cadherin                                     | -             |
| X60489       | Human mRNA for elongation factor-1-beta                           | -             |
| U22055       | Human 100 kDa coactivator mRNA                                    | -             |
| M26383       | Human monocyte-derived neutrophil-activating protein (MONAP) mRNA | -             |
| L07648       | Human MXI1 mRNA                                                   | -             |
| R87126       | MYOSIN HEAVY CHAIN, NONMUSCLE (Gallus gallus)                     | -             |
| M91463       | Human glucose transporter (GLUT4) gene                            | -             |
| R44418       | EBNA-2 NUCLEAR PROTEIN (Epstein-barr virus)                       | -             |
| M36634       | Human vasoactive intestinal peptide (VIP) mRNA                    | -             |
| R71875       | GLYCOGENIN (Oryctolagus cuniculus)                                | -             |
| T86473       | NUCLEOSIDE DIPHOSPHATE KINASE A (HUMAN)                           | -             |
| H08393       | COLLAGEN ALPHA 2(XI) CHAIN (Homo sapiens)                         | -             |
| R44301       | MINERALOCORTICOID RECEPTOR (Homo sapiens)                         | -             |
| J05032       | Human aspartyl-tRNA synthetase alpha-2 subunit mRNA               | -             |
| H77597       | H.sapiens mRNA for metallothionein (HUMAN)                        | -             |
| T48014       | HEMOGLOBIN ALPHA CHAIN (HUMAN)                                    | -             |
| U25138       | Human MaxiK potassium channel beta subunit mRNA                   | -             |
| M80815       | H.sapiens a-L-fucosidase gene                                     | -             |
| K03460       | Human alpha-tubulin isotype H2-alpha gene                         | -             |
| X68314       | H.sapiens mRNA for glutathione peroxidase-GI                      | -             |
| H20709       | MYOSIN LIGHT CHAIN ALKALI, SMOOTH-MUSCLE ISOFORM (HUMAN)          | -             |
| H06524       | GELSOLIN PRECURSOR, PLASMA (HUMAN)                                | -             |
| Z49269       | H.sapiens gene for chemokine HCC-1                                | -             |

Note: - means not being selected in the list

## References

- [1] Silvio Bicciato, Mario Pandin, Giuseppe Didone, and Carlo Di Bello. Pattern identification and classification in gene expression data using an autoassociative neural network model. *Biotechnology and bioengineering*, 81(5):594–606, 2003.
- [2] J. Khan and et al. Classification and diagnostic prediction of cancers using gene expression profiling and artificial neural networks. *Nature Medicine*, 7(6):673–679, June 2001.

- [3] M. West and et al. Predicting the clinical status of human breast cancer by using gene expression profiles. *Proc. Natl. Acad. Sci. USA*, 98(20):11462–11467, September 2001.
